# Supplementary material
Source: Springer Nature journal article supplement (https://www.springermedizin.de/resource/supplementary/13256_2012_2282_MOESM4_ESM.pdf/9649424)

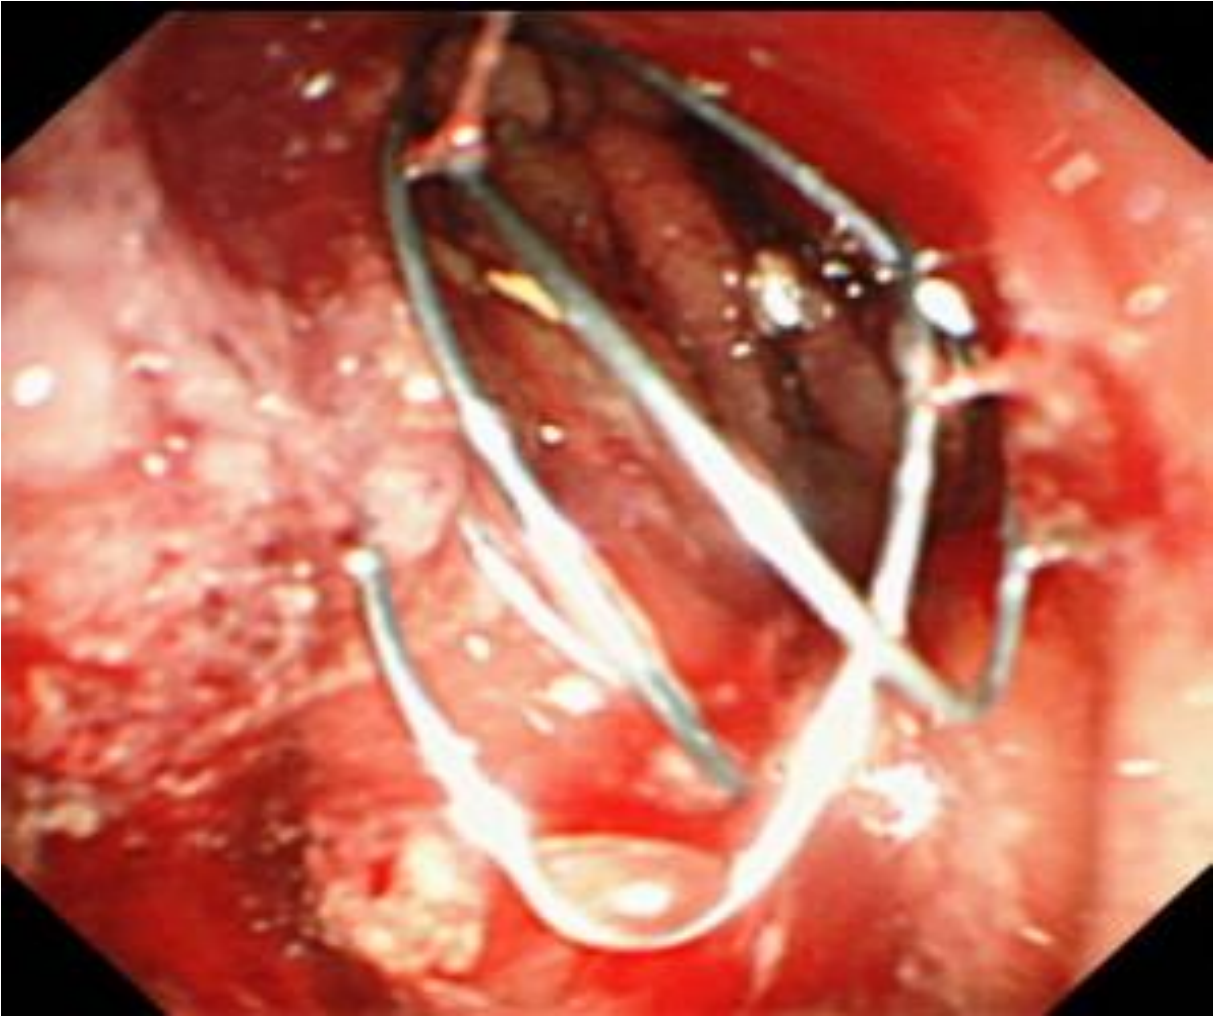

Supplement: MOESM4 [file 9649424]
